# Supplementary material for: Using the Photo–Piezoelectric Effect of AuPt@BaTiO3 Oxidase Mimetics for Colorimetric Detection of GSH in Serum
Source: MDPI journal article supplement (doi:10.3390/s24072242), 2024-03-31
Supplement: s1 [file s1]

# Using the Photo-Piezoelectric Effect of AuPt@BaTiO<sub>3</sub> Oxidase Mimetics for Colorimetric Detection of GSH in Serum

Yiquan Liao, Yichang He, Bin Zhang, Ye Ma \*, Ruiqi Xu, Minggang Zhao \* and Hongzhi Cui

School of Materials Science and Engineering, Ocean University of China, 266100 Qingdao, China

\* Correspondence: maye@ouc.edu.cn (Y.M.); zhaomg@ouc.edu.cn (M.Z.)

## Table of contents

|                                           |   |
|-------------------------------------------|---|
| 1. Fabrication process of nanozymes ..... | 3 |
| 2. EDX.....                               | 3 |
| 3. EDS mapping .....                      | 3 |
| 4. XRD.....                               | 4 |
| 5. Optimum condition .....                | 4 |
| 6. DMPO-EPR.....                          | 7 |
| 7. Steady-state kinetics .....            | 7 |
| 8. Stability.....                         | 8 |

## 1. Fabrication process of nanozymes

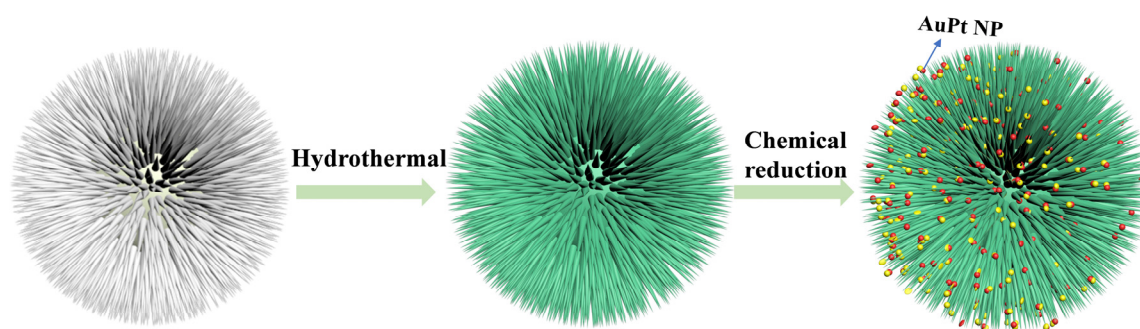

**Figure S1.** Fabrication process of the AuPt@BaTiO<sub>3</sub> SUMs.

## 2. EDX

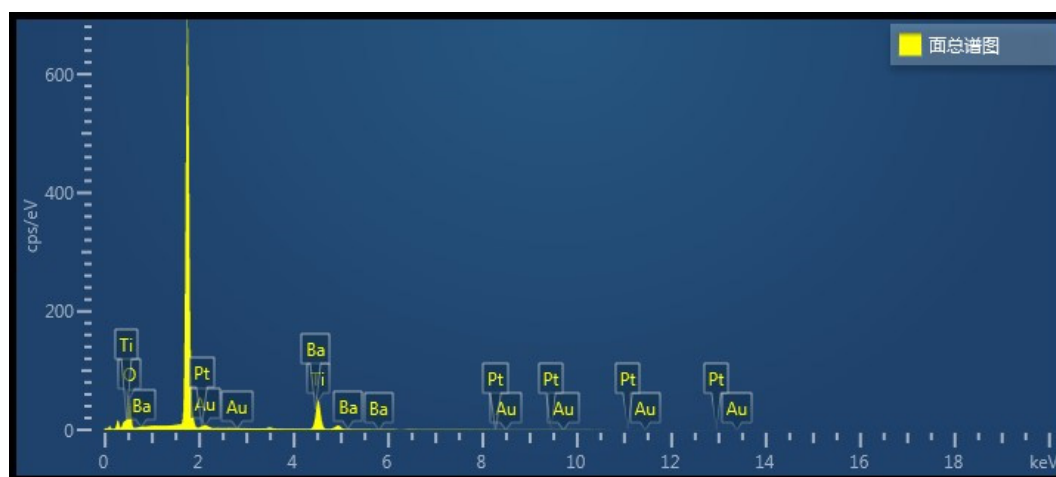

**Figure S2.** EDX photo of the prepared AuPt@BaTiO<sub>3</sub> SUMs.

## 3. EDS mapping

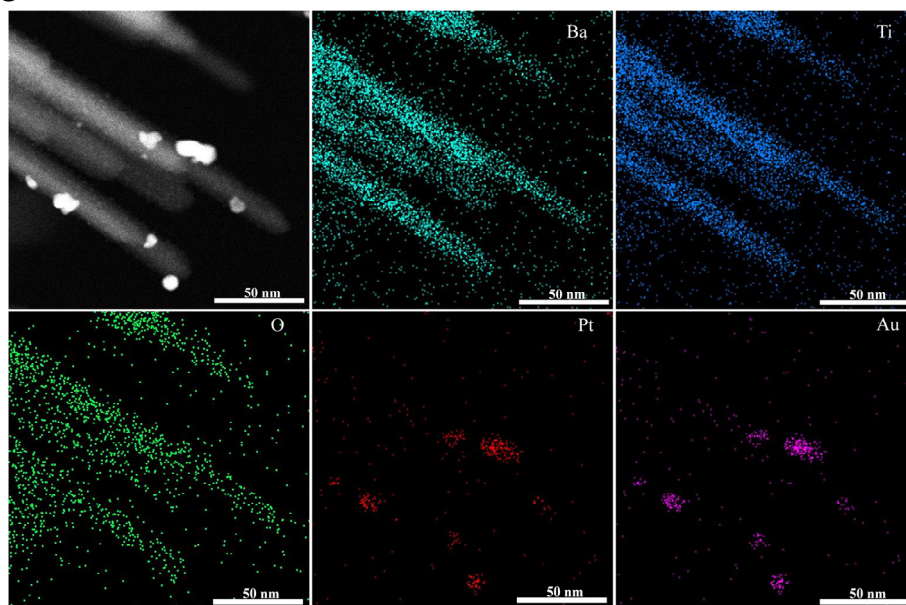

**Figure S3.** EDS mapping of the AuPt@BaTiO<sub>3</sub> SUMs.

#### 4. XRD

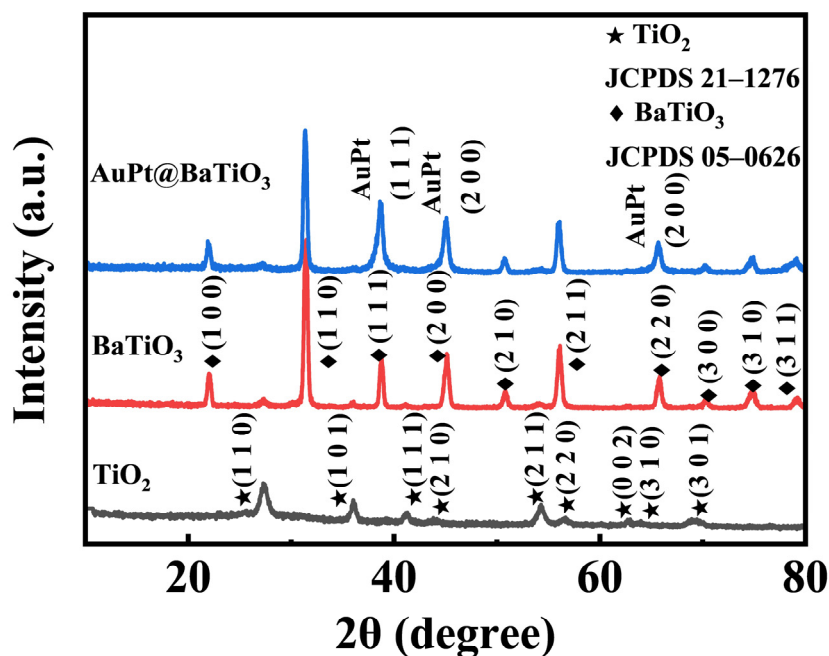

**Figure S4.** XRD patterns of the TiO<sub>2</sub>, BaTiO<sub>3</sub> SUMs, and the AuPt@BaTiO<sub>3</sub> SUMs.

#### 5. Optimum condition

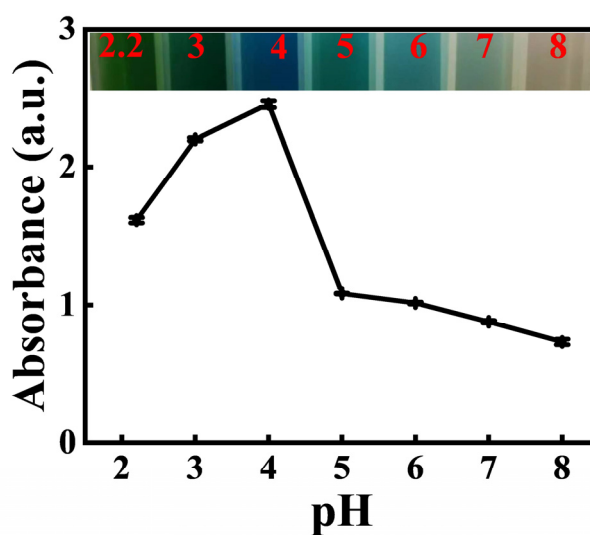

**Figure S5.** The oxidase-like activity of AuPt@BaTiO<sub>3</sub> SUMs depends on pH. Reaction condition: 0.28 mg mL<sup>-1</sup> AuPt@BaTiO<sub>3</sub> SUMs, 0.2 M Na<sub>2</sub>HPO<sub>4</sub>-CA buffer, 0.5 mM TMB, 10 min, and 20 °C.

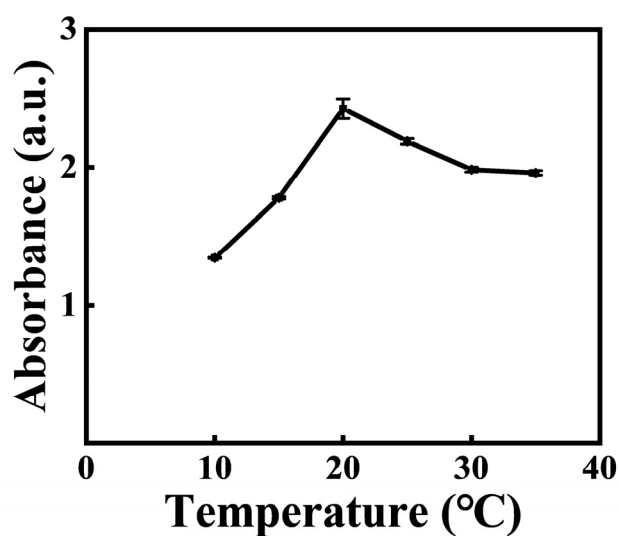

**Figure S6.** The oxidase-like activity of AuPt@BaTiO<sub>3</sub> SUMs depends on temperature. Reaction condition: 0.28 mg mL<sup>-1</sup> AuPt@BaTiO<sub>3</sub> SUMs, 0.2 M Na<sub>2</sub>HPO<sub>4</sub>-CA buffer (pH=4.0), 0.5 mM TMB, and 10 min.

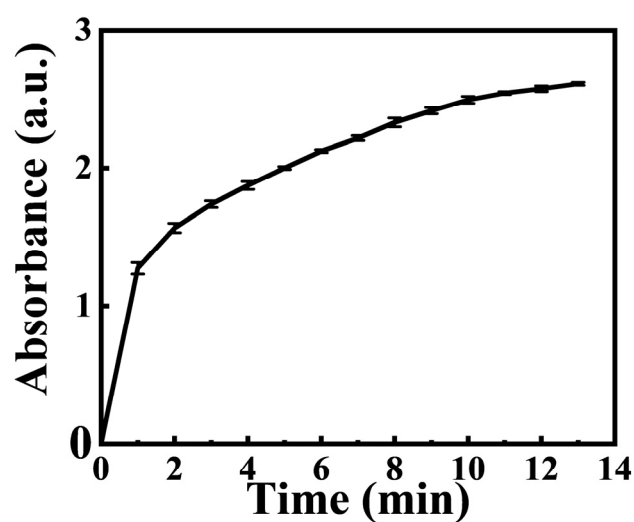

**Figure S7.** Time-dependent absorbance changes of TMB oxidation at 652 nm. Reaction condition: 0.28 mg mL<sup>-1</sup> AuPt@BaTiO<sub>3</sub> SUMs, 0.2 M Na<sub>2</sub>HPO<sub>4</sub>-CA buffer (pH=4.0), 0.5 mM TMB, and 20 °C.

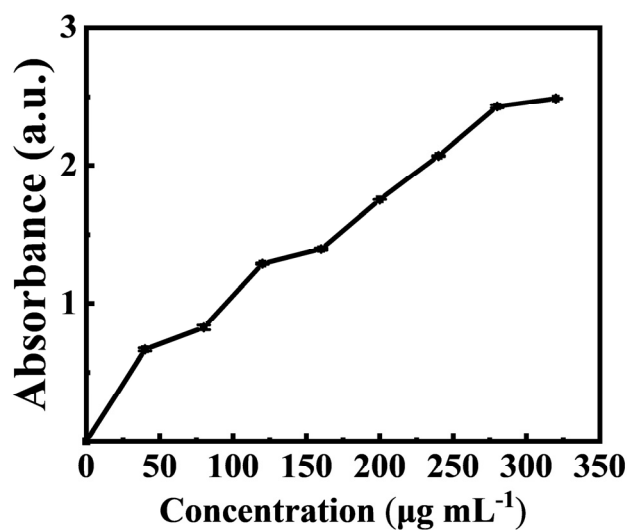

**Figure S8.** The concentration effects on the oxidase-like activity of the AuPt@BaTiO<sub>3</sub> SUMs.

Reaction condition: 0.2 M Na<sub>2</sub>HPO<sub>4</sub>-CA buffer (pH=4.0), 0.5 mM TMB, 10 min, and 20 °C.

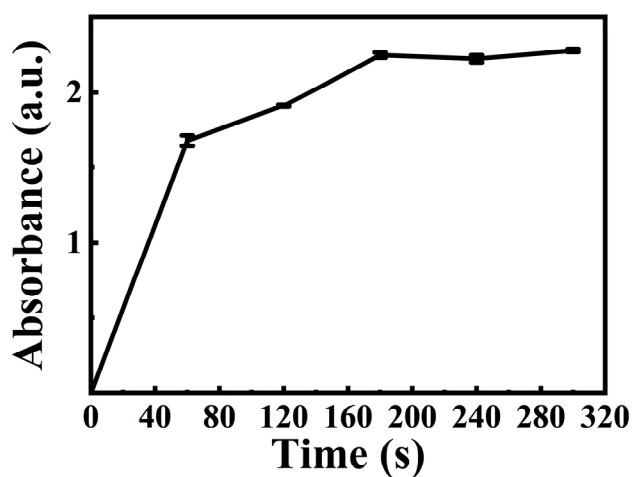

**Figure S9.** Time-dependent absorbance changes of TMB oxidation at 652 nm. Reaction condition:

0.28 mg mL<sup>-1</sup> AuPt@BaTiO<sub>3</sub> SUMs, 0.2 M Na<sub>2</sub>HPO<sub>4</sub>-CA buffer (pH=4.0), Hg lamp and ultrasound, 0.5 mM TMB, and 20 °C.

## 6. DMPO-EPR

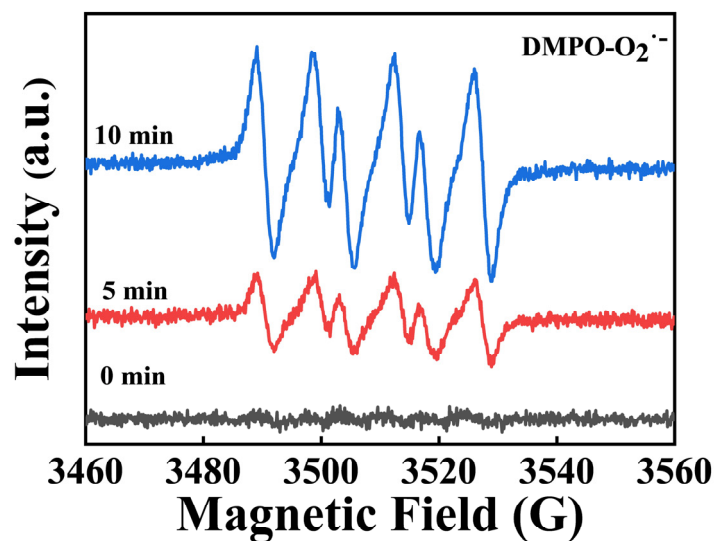

**Figure S10.** DMPO-EPR spin-trapping spectra for  $O_2^{\bullet-}$ .

## 7. Steady-state kinetics

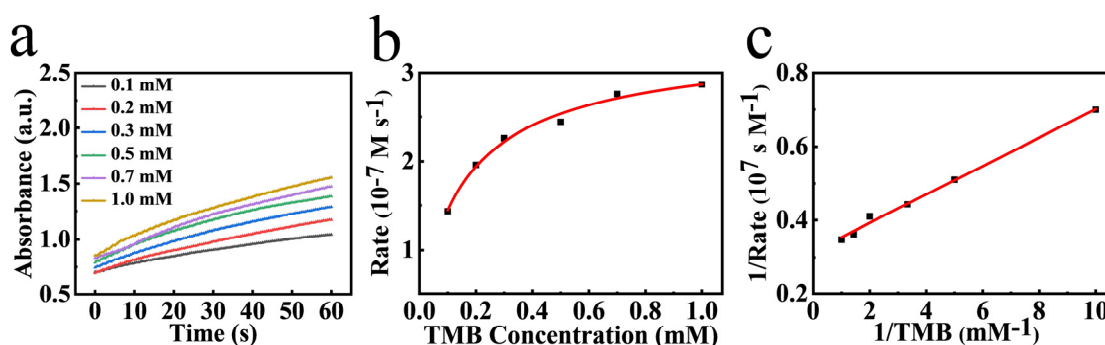

**Figure S11.** Steady-state kinetics of TMB oxidation using the AuPt@BaTiO<sub>3</sub> SUMs: (a) Typical absorbance spectra of different reaction systems for 1 min. (b) Michaelis–Menten curves for different TMB concentrations. (c) Lineweaver–Burk plot for different TMB concentrations.

## 8. Stability

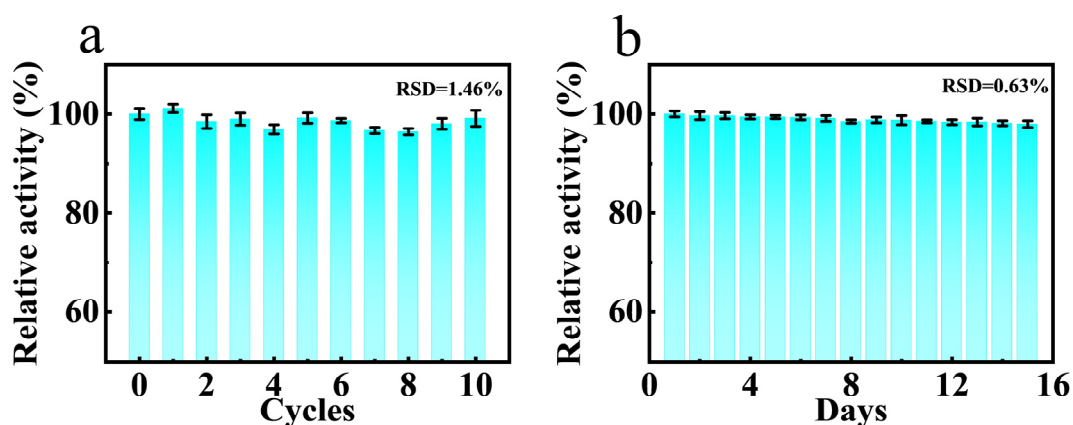

**Figure S12.** (a) The short-term stability of the AuPt@BaTiO<sub>3</sub> SUMs. (b) The long-term storage stability of the AuPt@BaTiO<sub>3</sub> SUMs.

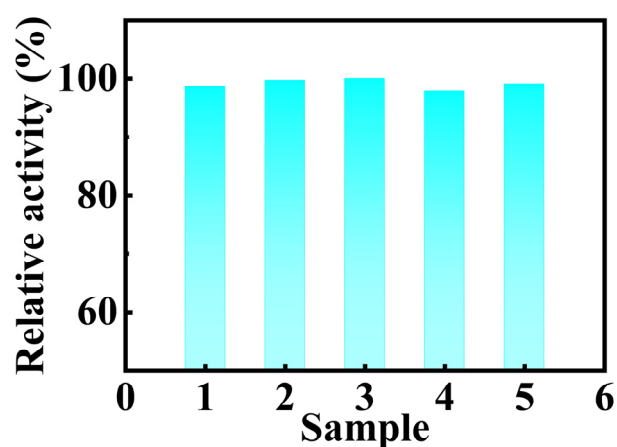

**Figure S13.** The reproducibility of the AuPt@BaTiO<sub>3</sub> SUMs.

**Table S1.** Data of catalytic kinetic parameters.

| TMB<br>concentration<br>(mM) | k       | initial reaction<br>rate (V) | Michaelis-Menten curve |      | Lineweaver-Burk |        |
|------------------------------|---------|------------------------------|------------------------|------|-----------------|--------|
|                              |         |                              | x                      | y    | x               | y      |
| 0.1                          | 0.00558 | 1.43E-07                     | 0.1                    | 1.43 | 10              | 0.6993 |
| 0.2                          | 0.00765 | 1.96E-07                     | 0.2                    | 1.96 | 5               | 0.5102 |
| 0.3                          | 0.00883 | 2.26E-07                     | 0.3                    | 2.26 | 3.333           | 0.4425 |
| 0.5                          | 0.00953 | 2.44E-07                     | 0.5                    | 2.44 | 2               | 0.4098 |



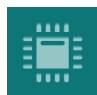

|     |         |          |     |      |       |        |
|-----|---------|----------|-----|------|-------|--------|
| 0.7 | 0.01078 | 2.76E-07 | 0.7 | 2.76 | 1.428 | 0.3623 |
| 1.0 | 0.01119 | 2.87E-07 | 1.0 | 2.87 | 1     | 0.3484 |

---
